# Supplementary material for: Human primary endothelial cells are impaired in nucleotide excision repair and sensitive to benzo[a]pyrene compared with smooth muscle cells and pericytes
Source: PubMed Central journal article supplement (PMC6760230; doi:10.1038/s41598-019-49953-w), 2019-09-24
Supplement: 41598_2019_49953_MOESM1_ESM.pdf [file 41598_2019_49953_MOESM1_ESM.pdf]

## Supplementary material

### Human primary endothelial cells are impaired in nucleotide excision repair and sensitive to benzo[a]pyrene compared with pericytes and smooth muscle cells

Joana M. Kress<sup>1</sup>, Lorella Di Dio<sup>1</sup>, Larissa Heck<sup>1</sup>, Alberto Izzotti<sup>2</sup>, Alessandra Pulliero<sup>2</sup>, Kathrin Laarmann<sup>3</sup>, Gerhard Fritz<sup>3</sup> and Bernd Kaina<sup>1</sup>

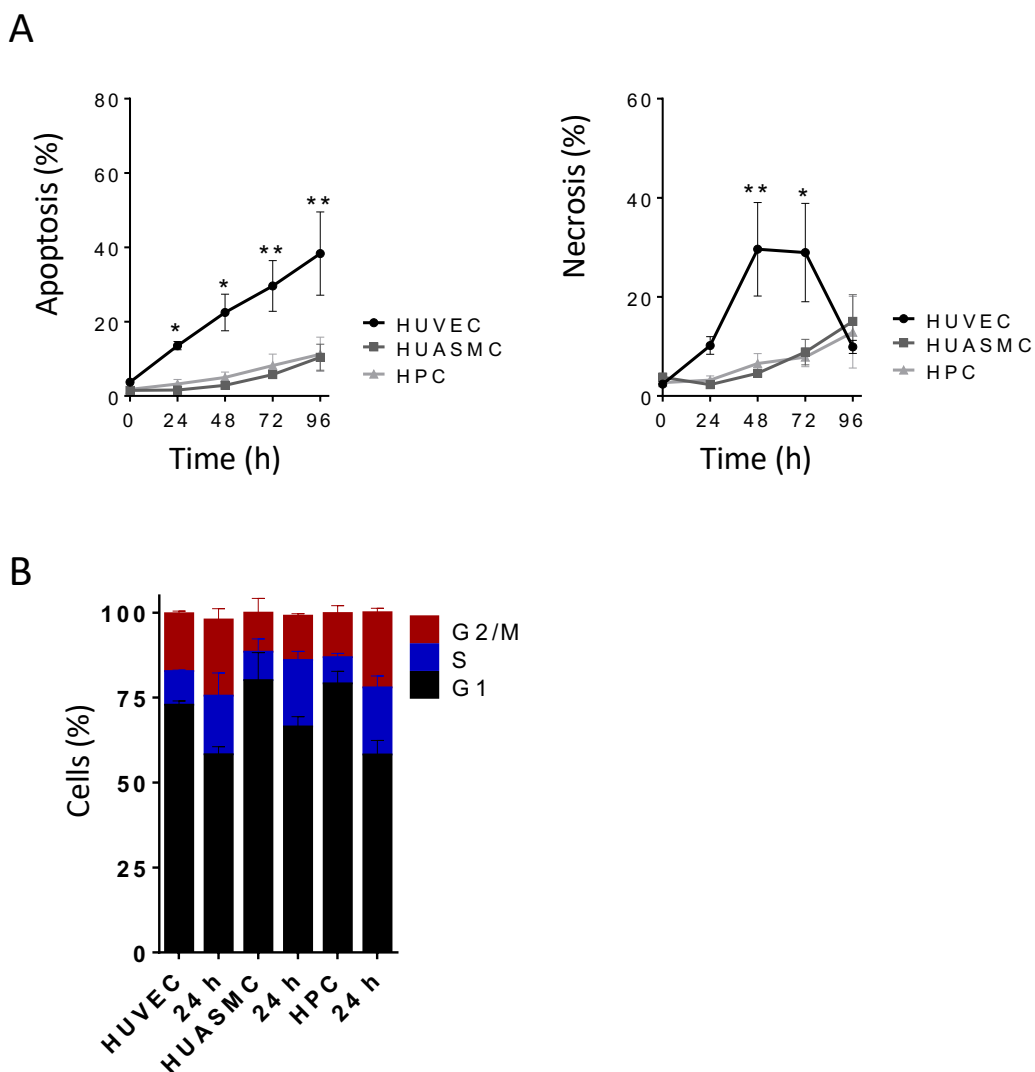

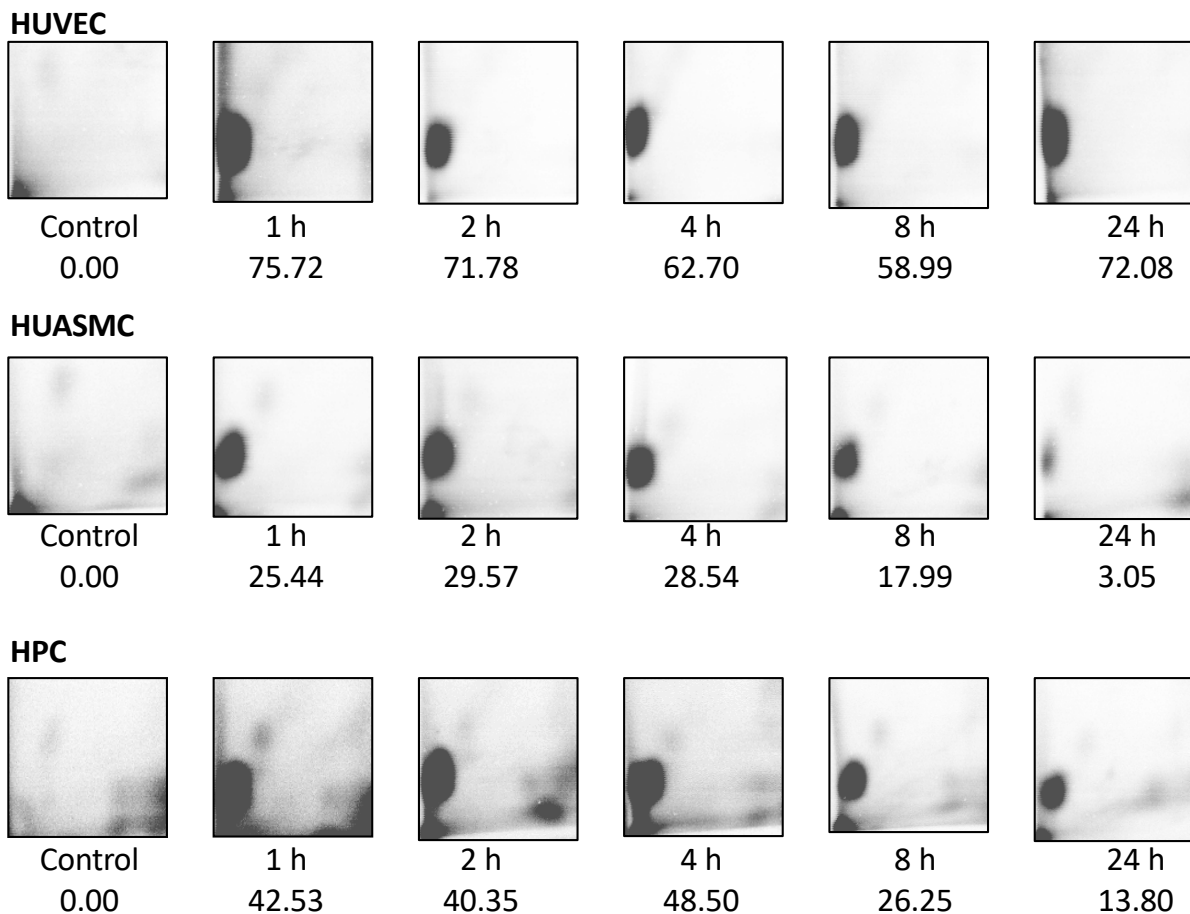

**Figure S2: Time-dependent BPDE-adduct levels.** BPDE-adducts per  $10^8$  nucleotides were determined 1, 2, 4, 8 and 24 h after exposure to  $0.5 \mu\text{M}$  BPDE. Representative plots are shown.

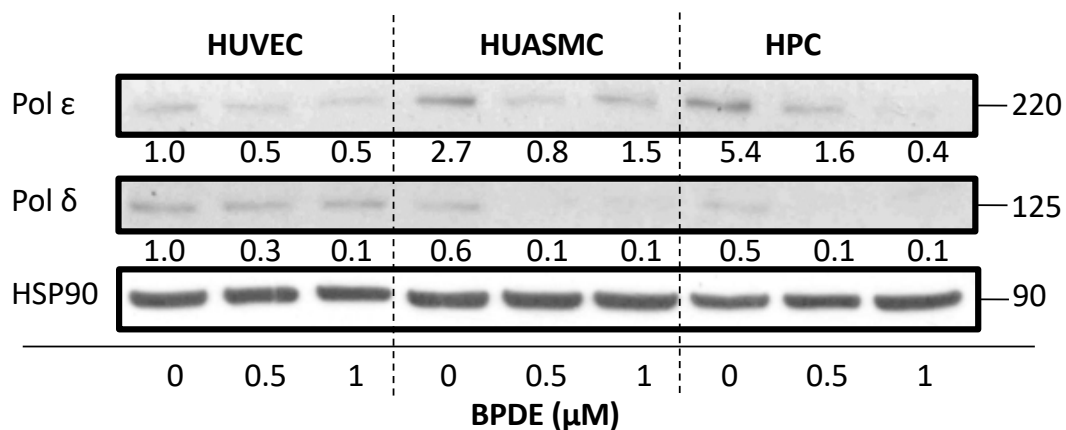

**Figure S3: Expression of NER-polymerases in HUVEC, HUASMC and HPC.** Exponentially growing cells were not treated or treated with BPDE with doses of  $0.5$  and  $1 \mu\text{M}$  and cells were harvested 24 h later. HSP90 served as loading control.

**Supplementary Table 1: Primer sequences for qPCR.**

| <b>Gene</b>  | <b>Forward (5`-3`)</b> | <b>Reverse (3`-5`)</b> |
|--------------|------------------------|------------------------|
| <i>DDB2</i>  | TGTAGCCTGGATGTGTTCT    | GCATTCTGAGATTCCAAAGC   |
| <i>XPC</i>   | ACACCTACTACCTCTCAA     | TAAATAGCAAATCTCCTTTCC  |
| <i>p21</i>   | TACATCTTCTGCCTTAGT     | TCTTAGGAACCTCTCATT     |
| <i>Gapdh</i> | CATGAGAAGTATGACAACAG   | ATGAGTCCTTCCACGATA     |
| <i>Actb</i>  | TGGCATCCACGAAACTACC    | GTGTTGGCGTACAGGTCTT    |
